# Supplementary material
Source: PubMed Central journal article supplement (PMC6042126)
Supplement: pnas.1805569115.sapp.pdf [file pnas.1805569115.sapp.pdf]

## Supplementary Information for

Squeezing and stick-slip friction behaviors of lubricants in boundary lubrication

Rong-Guang Xu and Yongsheng Leng

Corresponding author: Yongsheng Leng  
Email: [leng@gwu.edu](mailto:leng@gwu.edu)

### **This PDF file includes:**

Captions for movies I to III:

Molecular Animation I: Video for  $n = 5 \rightarrow 4$  liquidlike-to-solidlike phase transition within a time period of 2 ns

Molecular Animation II: Molecular motions of individual cyclohexane molecules in  $n = 3$  solidified film within a time period of 100 ps

Molecular Animation III: Molecular motions of individual cyclohexane molecules in the bulk lubricant within a time period of 100 ps
